# Supplementary material for: Revealing silver cytotoxicity using Au nanorods/Ag shell nanostructures: disrupting cell membrane and causing apoptosis through oxidative damage
Source: Royal Society of Chemistry journal article supplement (doi:10.1039/c2ra23131j), 2012-12-04
Supplement: c2ra23131j.pdf [file c2ra23131j.pdf]

## Supporting information

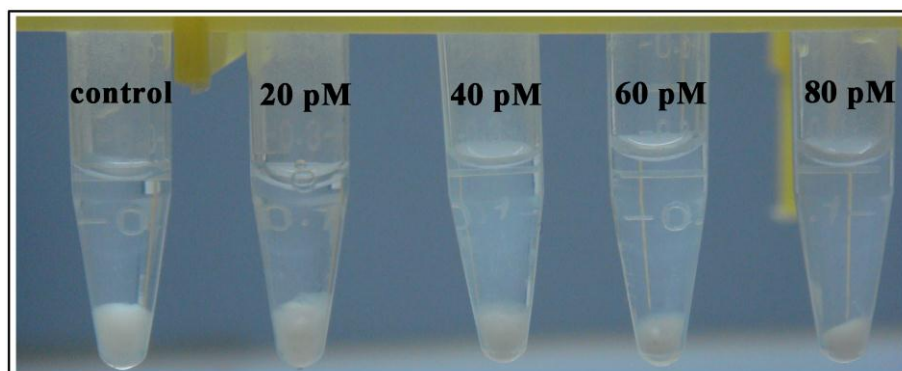

**Fig. S1** Digital photo of the cell pellets after incubation with various concentrations of AgNRs for 24 hours.
